# Supplementary material
Source: PubMed Central journal article supplement (PMC2932437)
Supplement: NIHMS178188-supplement-1.pdf [file NIHMS178188-supplement-1.pdf]

Supporting online material for

**Nucleosome Dynamics Define Transcriptional Enhancers**

Housheng Hansen He, Clifford A Meyer, Hyunjin Shin, Shannon T Bailey, Gang Wei, Qianben Wang, Yong Zhang, Kexin Xu, Min Ni, Mathieu Lupien, Piotr Mieczkowski, Jason D Lieb, Keji Zhao, Myles Brown\*, Xiaole Shirley Liu\*

\* To whom correspondence should be addressed. Email: [Myles\\_Brown@dfci.harvard.edu](mailto:Myles_Brown@dfci.harvard.edu), [xshiu@jimmy.harvard.edu](mailto:xshiu@jimmy.harvard.edu)

**Supplementary Figures**

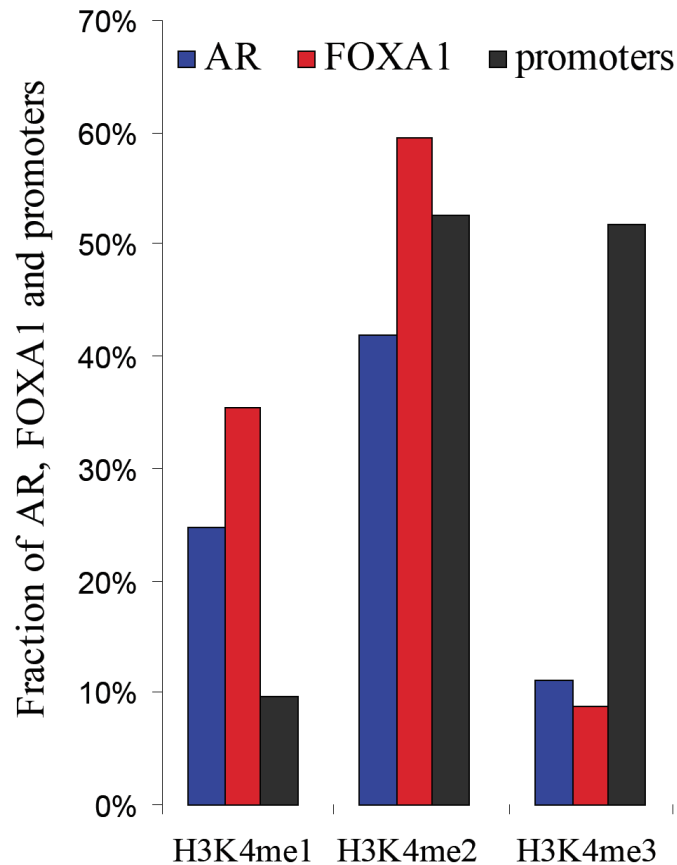

**Supplementary Figure 1. Fraction of AR, FOXA1 binding sites and refseq promoter regions overlapping with H3K4me1/2/3 peak regions.** 8727 AR and 10006 FOXA1 binding sites were identified by CHIP-chip. Upstream and downstream 1 kb regions of the transcription start sites of the 39289 refseq genes (hg18) were determined as promoter regions. H3K4me1/2/3 peak regions were identified using MACS software.

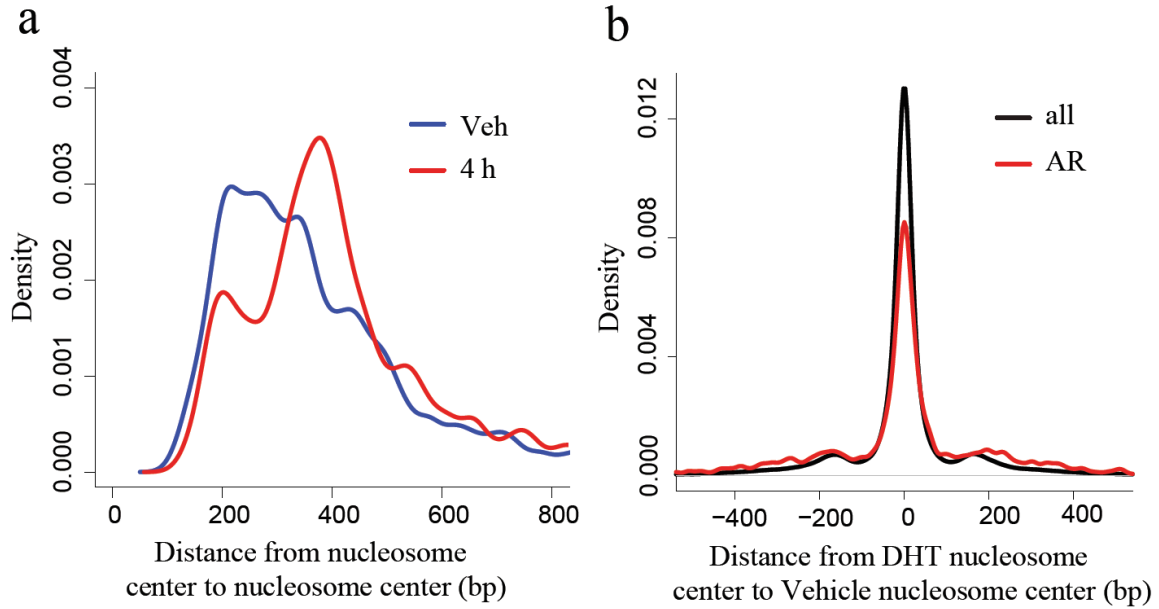

**Supplementary Figure 2. Signal distribution and nucleosome position analysis in the AR and FOXA1 binding regions identified by ChIP-chip experiment.** (a) Nucleosome center-to-center distance distributions between the nearest nucleosomes upstream and downstream of the AR motif in the AR binding sites under vehicle (red) and 4 hours after DHT stimulation (blue). (b) Distributions of location shifts between nucleosomes under vehicle and after 4 hours of DHT treatment. Nucleosomes detected within 500 bp of AR binding sites (red) under DHT and further than 500 bp of AR sites (black) are matched with the nearest identified nucleosome detected under vehicle conditions.

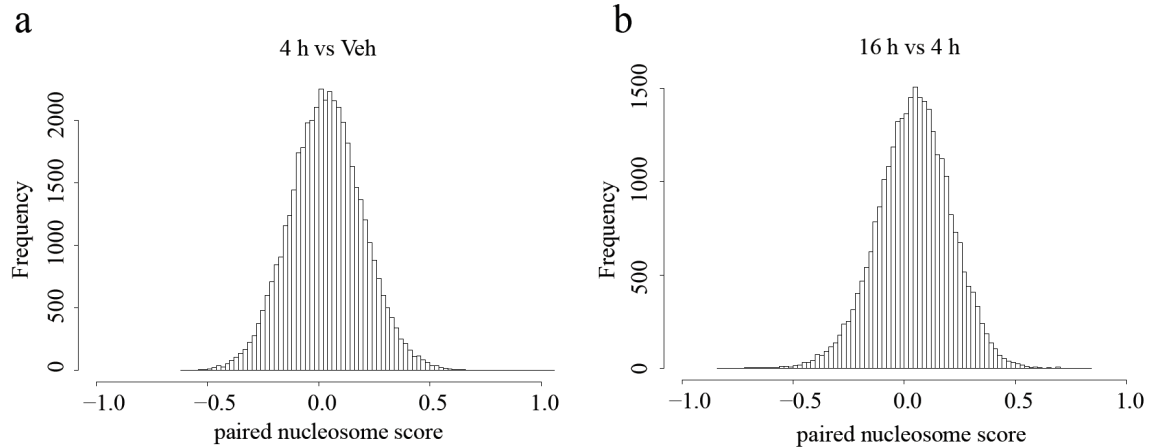

**Supplementary Figure 3. Distribution of the scores of paired nucleosome regions under the conditions of DHT 4 hours vs vehicle (a) and DHT 16 hours vs 4 hours (b).** The NSD score for each paired nucleosome region was calculated using the formula in the manuscript. The y-axis represents the number of the paired nucleosome regions within each score bin.

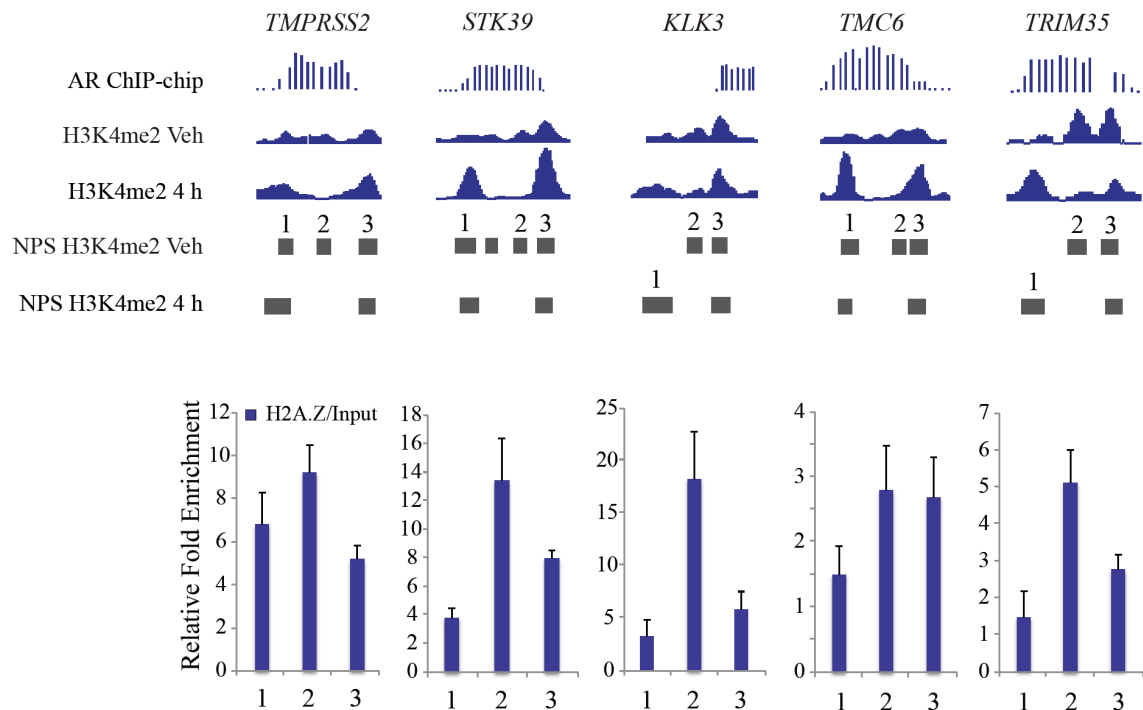

**Supplementary Figure 4. H2A.Z ChIP-qPCR at 5 AR binding sites.** Five AR binding sites near the genes *TMPRSS2*, *STK39*, *KLK3*, *TMC6* and *TRIM35* are shown. “AR ChIP-chip” represents the AR ChIP-chip signals; “H3K4me2 Veh” and “H3K4me2 4 h”

represent H3K4me2 ChIP-Seq signals under vehicle condition and after 4 hours of DHT treatment. Each horizontal bar represents a NPS peak region. “H2A.Z/Input” represents the qPCR assay of fold change for H2A.Z signal under vehicle condition.

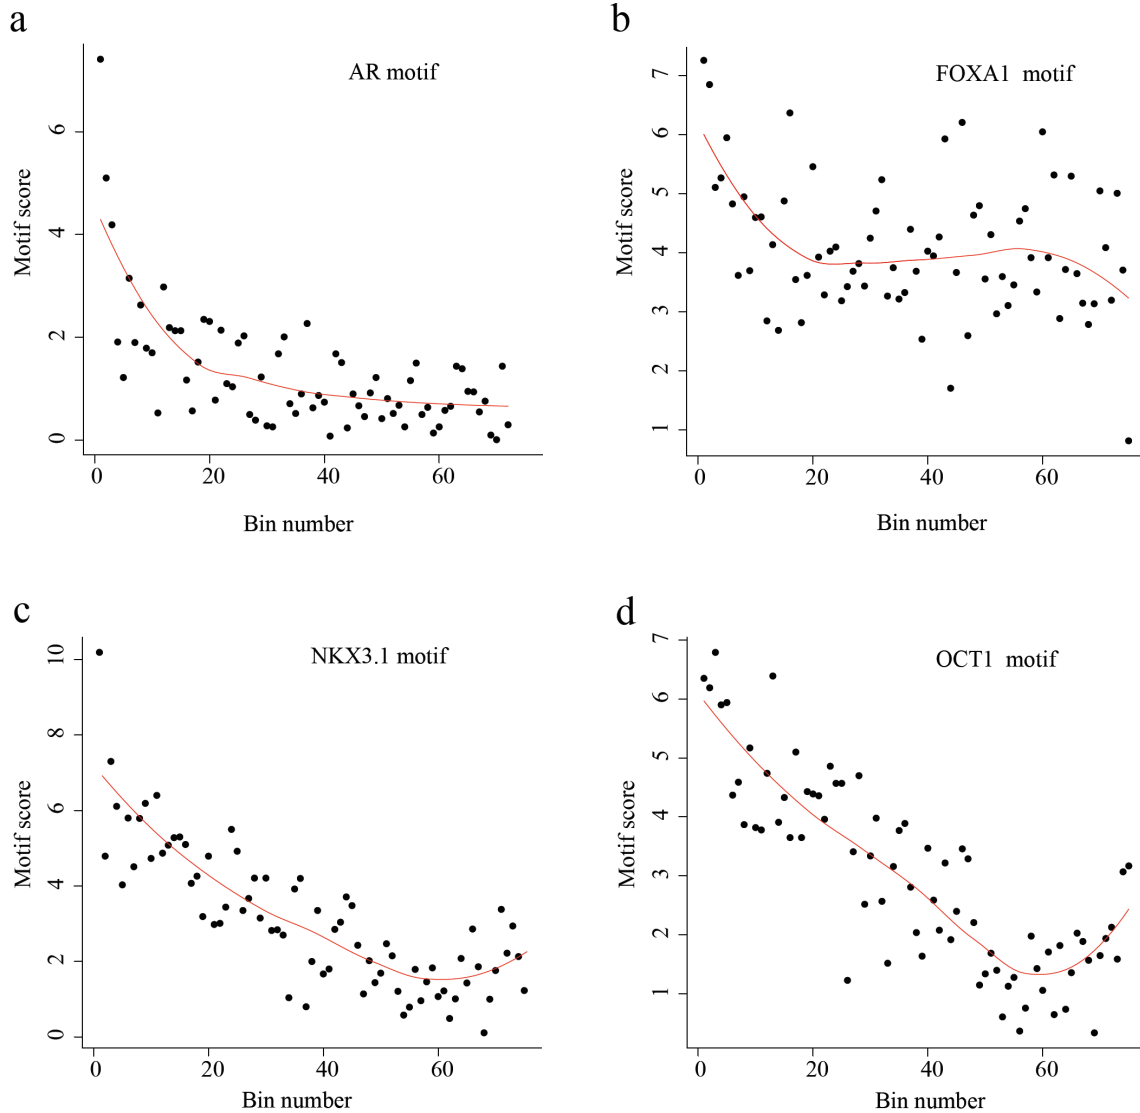

**Supplementary Figure 5. Motif scores of AR (a), FOXA1 (b), NKX3.1 (c) and OCT1 (d) in paired nucleosome bins.** Paired nucleosome regions are ranked by scores representing the differences in H3K4me2 tag counts before and after DHT treatment. These ranked regions are grouped into bins of 500. The centrality bias (as described in Materials and Methods) statistic for each of these bins is represented on the y-axis.

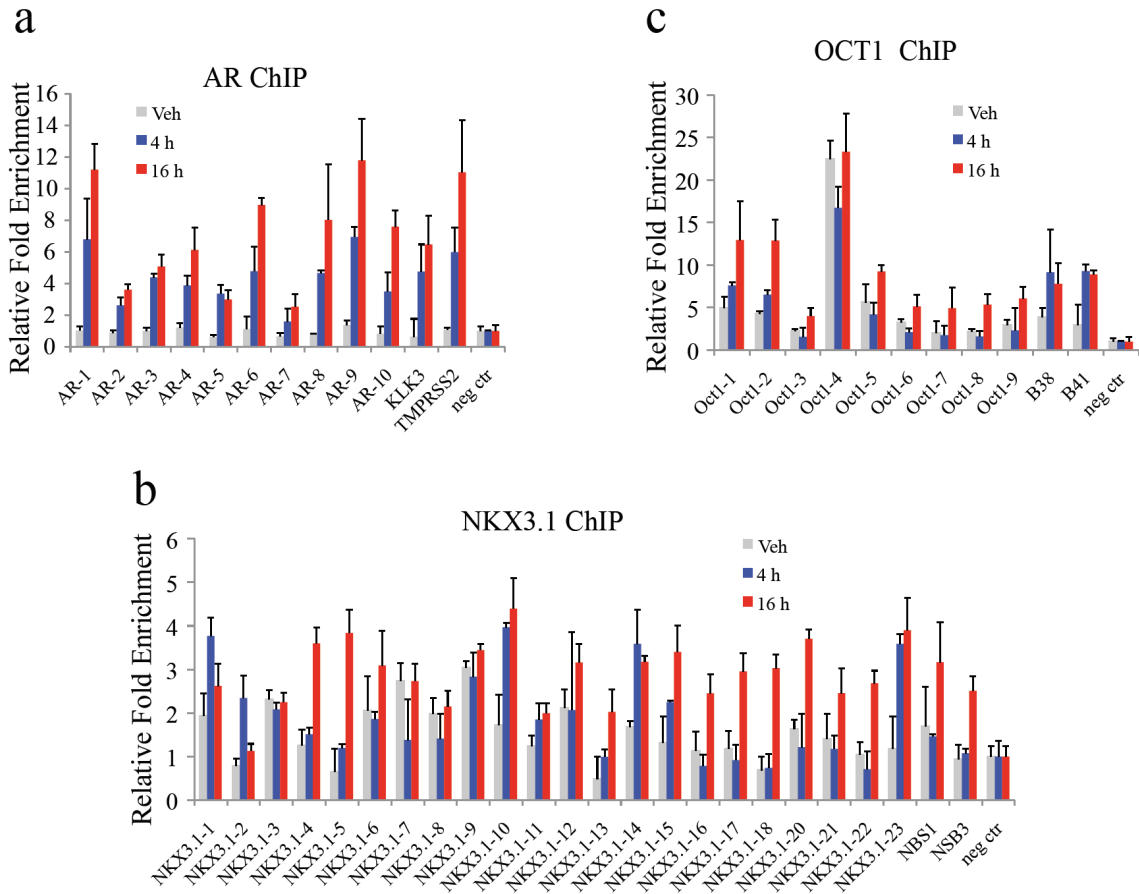

**Supplementary Figure 6. ChIP-qPCR validation of predicted (a) AR, (b) NKX3.1 and (c) OCT1 binding sites.** Ten sites with an AR motif, but not overlapping with AR ChIP-chip binding sites, are selected from the top 1000 paired nucleosome regions (4 h vs. Veh). Two known AR binding sites in the enhancer region of *KLK3* and *TMPRSS2* are selected as positive controls. Twenty-two sites with NKX3.1 motif are selected from the top 1000 paired nucleosome regions (16 h vs. 4 h). *NBS1* and *NBS3* are 2 known NKX3.1 binding regions <sup>1</sup>. Nine sites with OCT1 motif are selected from the top 1000 paired nucleosome regions (16 h vs. 4 h), *B38* and *B41* are 2 known OCT1 binding sites <sup>2</sup>.

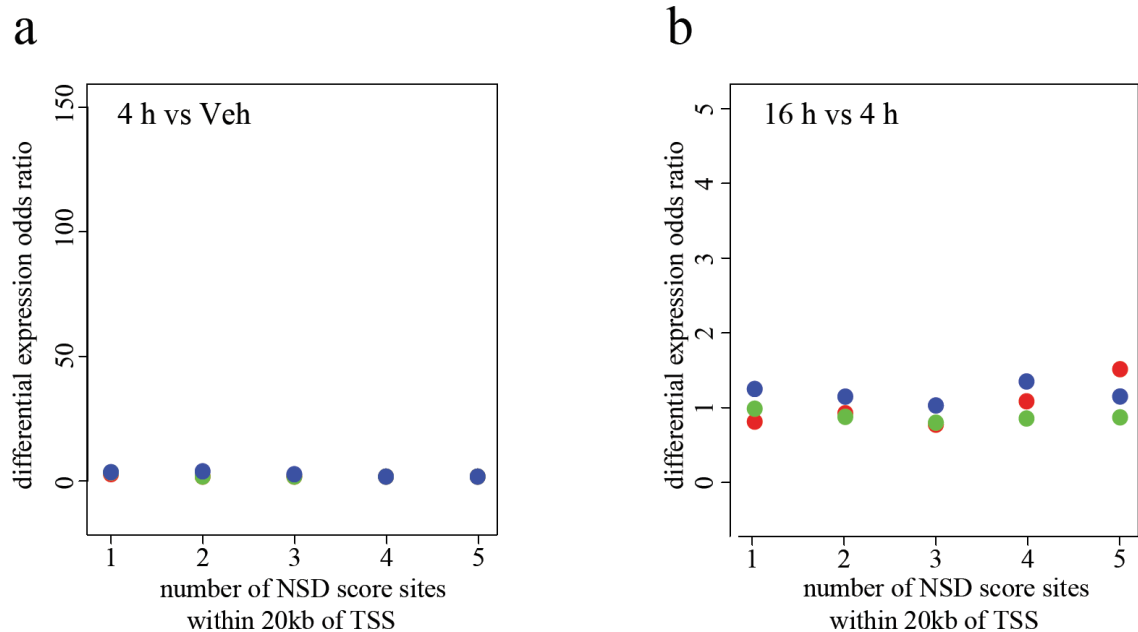

**Supplementary Figure 7. Correlation of score and number of NSD scoring sites and down-regulated gene expression.** (a) 4 h vs Veh, (b) 16 h vs 4 h. X axis represents the lower bound  $n$  of the number of sites within 20 kb of the TSS of a gene, Y axis represents the odds ratio calculated by the formula (down-regulated genes with at least  $n$  sites/non-regulated genes with at least  $n$  sites)/(all down-regulated genes/all non-regulated genes). Red, green and blue dots represent the top 5000, 10,000 and 20,000 NSD score sites, respectively. This shows that the likelihood of a gene being down-regulated does not change with the number and score of paired nucleosome sites.

**Supplementary Table 1.** Summary data for ChIP-seq regions enriched in H3K4me2 and H3K4me3

| Antibody | Condition | Tag number | MACs peaks | NPS Positioned nucleosomes |
|----------|-----------|------------|------------|----------------------------|
| H3K4me3  | Veh       | 6.5 M      | 18424      | 74491                      |
| H3K4me3  | DHT 4 h   | 6.5 M      | 20273      | 104022                     |
| H3K4me2  | Veh       | 12.7 M     | 85830      | 235549                     |
| H3K4me2  | DHT 4 h   | 12.7 M     | 90053      | 248486                     |
| H3K4me2  | DHT 16 h  | 12.7 M     | 86728      | 237595                     |

**Supplementary Table 2.** Motifs enriched in 1000 paired nucleosome regions with highest NSD scores.

| 4h vs. Veh               |          | 16h vs. 4h                 |          |
|--------------------------|----------|----------------------------|----------|
| motif                    | p-value  | motif                      | p-value  |
| M00289.HFH-3.matrix      | 1.00E-20 | M00131.HNF-3beta.matrix    | 1.00E-20 |
| M00422.FOXJ2.matrix      | 1.00E-20 | M00724.HNF-3alpha.matrix   | 1.13E-19 |
| M00266.Croc.matrix       | 1.00E-20 | M00130.FOXD3.matrix        | 1.13E-19 |
| M00724.HNF-3alpha.matrix | 1.00E-20 | M00422.FOXJ2.matrix        | 1.13E-19 |
| M00293.Freac-7.matrix    | 1.13E-19 | M00266.Croc.matrix         | 1.13E-19 |
| M00131.HNF-3beta.matrix  | 1.13E-19 | M00293.Freac-7.matrix      | 9.48E-18 |
| M00809.FOX.matrix        | 1.13E-19 | M00289.HFH-3.matrix        | 6.22E-16 |
| M00290.Freac-2.matrix    | 9.48E-18 | M00477.FOXO3.matrix        | 6.22E-16 |
| M00129.HFH-1.matrix      | 6.22E-16 | M00742.HFH-4.matrix        | 3.19E-14 |
| M01012.HNF3.matrix       | 6.22E-16 | M00791.HNF-3.matrix        | 3.19E-14 |
| <b>M00481.AR.matrix</b>  | 6.22E-16 | M00809.FOX.matrix          | 3.19E-14 |
| M00791.HNF-3.matrix      | 6.22E-16 | M00129.HFH-1.matrix        | 3.19E-14 |
| M00477.FOXO3.matrix      | 3.19E-14 | M00290.Freac-2.matrix      | 1.28E-12 |
| M00130.FOXD3.matrix      | 3.19E-14 | M01011.HNF1.matrix         | 1.28E-12 |
| <b>M00481.AR.matrix</b>  | 1.28E-12 | M00292.Freac-4.matrix      | 1.28E-12 |
| M00291.Freac-3.matrix    | 1.28E-12 | M01012.HNF3.matrix         | 4.02E-11 |
| <b>M00956.AR.matrix</b>  | 1.28E-12 | M00093.BR-C.matrix         | 4.02E-11 |
| <b>M00957.PR.matrix</b>  | 1.28E-12 | M00471.TBP.matrix          | 9.87E-10 |
| <b>M00953.AR.matrix</b>  | 1.28E-12 | M01010.HMGIY.matrix        | 1.38E-09 |
| <b>M00955.GR.matrix</b>  | 4.02E-11 | M00476.FOXO4.matrix        | 4.64E-09 |
| M00292.Freac-4.matrix    | 4.02E-11 | M00160.SRY.matrix          | 6.59E-09 |
| M00473.FOXO1.matrix      | 4.02E-11 | M00473.FOXO1.matrix        | 1.22E-08 |
| M00476.FOXO4.matrix      | 4.02E-11 | M00092.BR-C.matrix         | 1.39E-08 |
| M00472.FOXO4.matrix      | 4.02E-11 | <b>M00138.OCT1.matrix</b>  | 1.34E-08 |
| M00474.FOXO1.matrix      | 4.02E-11 | M00472.FOXO4.matrix        | 1.85E-08 |
| M00742.HFH-4.matrix      | 4.02E-11 | M00096.Pbx-1.matrix        | 2.89E-08 |
| M00093.BR-C.matrix       | 9.87E-10 | M00291.Freac-3.matrix      | 2.78E-08 |
| <b>M00954.PR.matrix</b>  | 9.87E-10 | <b>M00451.NKX3A.matrix</b> | 1.03E-07 |
| <b>M00921.GR.matrix</b>  | 1.14E-09 | M00980.TBP.matrix          | 2.30E-07 |
| M00160.SRY.matrix        | 1.52E-09 | M00987.FOXP1.matrix        | 5.99E-07 |
| <b>M00960.PR.matrix</b>  | 1.22E-08 | M00790.HNF-1.matrix        | 7.73E-07 |
| M00790.HNF-1.matrix      | 1.39E-08 |                            |          |
| M00980.TBP.matrix        | 1.42E-08 |                            |          |
| M00471.TBP.matrix        | 4.09E-08 |                            |          |
| M01011.HNF1.matrix       | 6.75E-08 |                            |          |

### Supplementary Table 3. Primers used for PCR.

Primers used in Fig. 2

|                  |                           |                  |                           |
|------------------|---------------------------|------------------|---------------------------|
| KLK3_nuc1_F      | GCAGTCTAGGTGGATGCTGT      | KLK3_nuc1_R      | GGTTTGCAAGTTGTCCCAGTA     |
| KLK3_nuc2_F      | TTATCTAGGACAGTAAGCAAGCC   | KLK3_nuc2_R      | GGATGTTTGTAAGCAGGCAT      |
| KLK3_nuc3_F      | TCCCAACACTGTTCAGCCA       | KLK3_nuc3_R      | GCAGGATGTGACAGAAGAAGTAT   |
| TMPRSS2_nuc1_F   | TCTGAGCCCCCTACAATTGCA     | TMPRSS2_nuc1_R   | TAGGGCAGGGGTGAGGAAGT      |
| TMPRSS2_nuc2_F   | GCCACCTGGTGAAGTGCAGA      | TMPRSS2_nuc2_R   | TGGAGCTAGTGCTGCATGTC      |
| TMPRSS2_nuc3_F   | AAAGGGCCTACAAGATAAGATC    | TMPRSS2_nuc3_R   | TCAACCATGGAAAGCAGGTG      |
| TRIM35_nuc1_F    | GGATTTTAGTAACATCTTTGGGG   | TRIM35_nuc1_R    | CCAATACATTATAATTTAGAGCAG  |
| TRIM35_nuc2_F    | AAAGGAGACAGACTGTTCTAGTACA | TRIM35_nuc2_R    | TTGTGTTGTTTGATTAGATAATCTG |
| TRIM35_nuc3_F    | CAACATAACCATTTTCTCATGC    | TRIM35_nuc3_R    | CAGATTTTAAACAAGAAGCTTTGCA |
| TMC6_nuc1_F      | GGGATTCTCCCAGCACCACT      | TMC6_nuc1_R      | TGGGTGGCATTTCAGAGC        |
| TMC6_nuc2_F      | AACTAGCCAGCAGCAGGGTCA     | TMC6_nuc2_R      | TGGCGTCTGCCAAGGCCA        |
| TMC6_nuc3_F      | CTAGCCCTGGTGTGGAGCAT      | TMC6_nuc3_R      | GCCATTTGTCCTCCTGCA        |
| STK39_nuc1_F     | GAATGTTCTGGAAGTTGGAAG     | STK39_nuc1_R     | GTTTGATAGGACTGATGCAGAATAA |
| STK39_nuc2_F     | CACACATCATGTAAGACCAAAGG   | STK39_nuc2_R     | CTTAACCTATTGCTGTATCCTAAGC |
| STK39_nuc3_F     | CAGGGCTGGAACCAAGAAGA      | STK39_nuc3_R     | GCACAGTCAACCTGACAACCTAG   |
| TMPRSS2_tile1_F  | TCTGAGCCCCCTACAATTGCA     | TMPRSS2_tile1_R  | TAGGGCAGGGGTGAGGAAGT      |
| TMPRSS2_tile2_F  | ACTTCTCACCCCTGCCCTA       | TMPRSS2_tile2_R  | GAAAAATGTTGGTCTGGATG      |
| TMPRSS2_tile3_F  | CATCCAGGACCAACATTTTC      | TMPRSS2_tile3_R  | TACGGCAGGTAACCTCATATCTGA  |
| TMPRSS2_tile4_F  | TTTAGACAACAAATGGCCACC     | TMPRSS2_tile4_R  | TGGAGCTAGTGCTGCATGTC      |
| TMPRSS2_tile5_F  | GCCACCTGGTGAAGTGCAGA      | TMPRSS2_tile5_R  | GGAGCTAGTGCTGCATGCTT      |
| TMPRSS2_tile6_F  | TCAGATATGAGTACCTGCCGTA    | TMPRSS2_tile6_R  | GGAAGCTGACCTTTAATGAAG     |
| TMPRSS2_tile7_F  | AAGACATGCAGCACTAGCTCC     | TMPRSS2_tile7_R  | CAGGATGTGAGCTTGAAATGT     |
| TMPRSS2_tile8_F  | ACATTTCAAGCTCACATCCTG     | TMPRSS2_tile8_R  | GACACTTCACCCATCTTTGACA    |
| TMPRSS2_tile9_F  | TGTCAAAGATGGGTGAAGTGTC    | TMPRSS2_tile9_R  | GATCTTATCTTGTAGGCCCTTT    |
| TMPRSS2_tile10_F | AAAGGGCCTACAAGATAAGATC    | TMPRSS2_tile10_R | TCAACCATGGAAAGCAGGTG      |
| STK39_tile1_F    | GAATGTTCTGGAAGTTGGAAG     | STK39_tile1_R    | GTTTGATAGGACTGATGCAGAATAA |
| STK39_tile2_F    | GGAACTATTCTGAGGAGGCAG     | STK39_tile2_R    | GGGAAATGCCATATTGGAG       |
| STK39_tile3_F    | GCACAGAGAAGCAATTAGATTT    | STK39_tile3_R    | GTTCTTTGTTGCCCTCACTT      |
| STK39_tile4_F    | TTATTCTGCATCAGTCCTATCAAAC | STK39_tile4_R    | GGCTCTTAGCTGTTGCCA        |
| STK39_tile5_F    | CTAAAGCTCCTGCTGGAAAG      | STK39_tile5_R    | GTGCTATTTGCTTACCAGGAC     |
| STK39_tile6_F    | GTCCTGGTAAGACAAATAGCAC    | STK39_tile6_R    | AACCTCGACTCTGCTCTGGA      |
| STK39_tile7_F    | CACACATCATGTAAGACCAAAGG   | STK39_tile7_R    | CTTAACCTATTGCTGTATCCTAAGC |
| STK39_tile8_F    | AAACCAAATGTTTGGCTCC       | STK39_tile8_R    | CCTCTTTCTTCTGCAGGTAAGC    |
| STK39_tile9_F    | TCCAGAGCAGAGTCGAGGTT      | STK39_tile9_R    | GTTGGCTGTGTGCTTCTCTT      |
| STK39_tile10_F   | GCTTAGGATACAGCAATAAGTTAAG | STK39_tile10_R   | TCTTCTGGTCCAGCCCTG        |
| STK39_tile11_F   | GCTTACCTGCAGAAGAAAGAGG    | STK39_tile11_R   | GTTGCTTGTGCAAAATCTTCTGG   |
| STK39_tile12_F   | AAGAGAAGCACACAGCCAAC      | STK39_tile12_R   | AACTGACCTCGCAGTGTGT       |
| STK39_tile13_F   | CAGGGCTGGAACCAAGAAGA      | STK39_tile13_R   | GCACAGTCAACCTGACAACCTAG   |

Primers used in Fig. 4a

|         |                           |         |                         |
|---------|---------------------------|---------|-------------------------|
| AR_1_F  | TCAACATCAAGATTCAAGCAAC    | AR_1_R  | TCTGCACATGTATCCTGGAA    |
| AR_2_F  | GGGCAGCACCAACATCACA       | AR_2_R  | TGTCCCAGTATTCAGACCAGAG  |
| AR_3_F  | ATAGAAAGTTTGTAACCTGCCAAGG | AR_3_R  | GCACAATCCAGAAAATGCTATT  |
| AR_4_F  | TGGAAGGCAAGTGGCAGA        | AR_4_R  | CCCATTACCCTGTACCTTGTT   |
| AR_5_F  | CACAGCATTAAAGTGAAGCTC     | AR_5_R  | TGGGAAACAAATGACAGGA     |
| AR_6_F  | TAAGGTGCCCTGGGATGGT       | AR_6_R  | GGAGGGGAACCAAGATTAAC    |
| AR_7_F  | CCTCCACACCAAGGAAATAA      | AR_7_R  | ACCAATAAAAATAGGCTAAAGGC |
| AR_8_F  | GCAGAAATGCAACACTGGT       | AR_8_R  | ACCAGGGAAATCGGAAGC      |
| AR_9_F  | ATCTCTAGTAACACATACTGAGGGC | AR_9_R  | CCTCAGGGTGAGAAATTAGACAT |
| AR_10_F | TGGTGATGAGATTGCGAAG       | AR_10_R | AGCCCCTTGCACTTCTT       |
| KLK3    | TTATCTAGGACAGTAAGCAAGCC   | KLK3    | GGATGTTTGTAAGCAGGCAT    |
| TMPRSS2 | GCCACCTGGTGAAGTGCAGA      | TMPRSS2 | TGGAGCTAGTGCTGCATGTC    |

Primers used in Fig. 4b

|          |                           |          |                          |
|----------|---------------------------|----------|--------------------------|
| OCT1_1_F | ATTTCTTTCCAAACATGTGAGAGTC | OCT1_1_R | GACTGAGTTGTTCTAGACAAGTGT |
|----------|---------------------------|----------|--------------------------|



|                         |                           |             |                            |
|-------------------------|---------------------------|-------------|----------------------------|
| OCT1_2_F                | ATCATCTGATCTCTGCTGGATC    | OCT1_2_R    | CGTGACACTTTAACTCCATAGTG    |
| OCT1_3_F                | GGAAAGCTGCTAAACATGGT      | OCT1_3_R    | GCAAAGCCAGCTCTGAAAA        |
| OCT1_4_F                | CAAGCCCCCATGACATGAG       | OCT1_4_R    | TGCCTGGCTCTTCCCCTA         |
| OCT1_5_F                | AGCCACAAATTCTATACTTACAACG | OCT1_5_R    | CTCATGCCACCAGAATTTATTT     |
| OCT1_6_F                | CTTGGGACAGGGTATGTTTT      | OCT1_6_R    | CCTTGTTTTTCTTCCAATCTT      |
| OCT1_7_F                | CAGGGTCCCTAGAGTCCAGA      | OCT1_7_R    | TTAAAGAGACAGCGTCTCGG       |
| OCT1_8_F                | AGACTGATGAAGGCAGAGAGAG    | OCT1_8_R    | CATGGCATATGTAGGGACTTT      |
| OCT1_9_F                | TTTTGGTGACTIONGACTGGCC    | OCT1_9_R    | AACGCGGAGGATCCTAAG         |
| B38_F                   | TGTAGGGAGGGAGCCACACT      | B38_R       | AATGGCCGGGTGTGCC           |
| B41_F                   | GCCTCCCCCGTGCAG           | B41_R       | TGCAAGGCACGTCTCAATTC       |
| Primers used in Fig. 4c |                           |             |                            |
| NBS3_F                  | AAGAATGAGCTGATCCTCCTATGC  | NBS3_R      | GGTTTAGTAATAGACTGGGCACCA   |
| NBS1_F                  | GATTCTTTGACTGGTCTGGCACAC  | NBS1_R      | TTATCCATTGTGCCTGGAGCTGAG   |
| NKX3.1-1_F              | ATTGTGTAACATATCGCCTCTGC   | NKX3.1-1_R  | CAAGTAGGTGATGGAAACAATGAAT  |
| NKX3.1-2_F              | TGTGACCAAGACAGTCATGC      | NKX3.1-2_R  | GAGAACTGCTCAGCAAGAAAA      |
| NKX3.1-3_F              | TGATCTGTTTTTGTGGCACAT     | NKX3.1-3_R  | CAGTTCTCTGCCTACGAATTATTTA  |
| NKX3.1-4_F              | GCTCTTGAATCATTGCACTAAG    | NKX3.1-4_R  | GAAGAAAAACAATATGCCAG       |
| NKX3.1-5_F              | CTCCTTCATGAGAGATGCGG      | NKX3.1-5_R  | GGCAGGGCCTATGTAATATTG      |
| NKX3.1-6_F              | TAGTTTAAATACAGTGCACACACAC | NKX3.1-6_R  | GGGCAGTATTTCTATTTAAACACCA  |
| NKX3.1-7_F              | CATGTACCCACATTCCATAAAA    | NKX3.1-7_R  | AAATTGTGACACCGCTGAGT       |
| NKX3.1-8_F              | GGTCACCACTCAGGTAGTATTGTT  | NKX3.1-8_R  | GTGCTAATAAGTATGTAAAAGACGG  |
| NKX3.1-9_F              | CTTTTTGCTTTGGCCACTA       | NKX3.1-9_R  | CACAGGCAAAAAGAAGACTTAAA    |
| NKX3.1-10_F             | GGTGCAATAATTACACATAGTCCT  | NKX3.1-10_R | CTTAAGAACCTGTACTAAGCAAGT   |
| NKX3.1-11_F             | CCAATATACACTGTGACCTTCATC  | NKX3.1-11_R | CTGACAGCTATACTAAAACCTCAGTG |
| NKX3.1-12_F             | TCATCAGCTCCAAGGAAAAC      | NKX3.1-12_R | CATATGCGTAGGATTCACAGC      |
| NKX3.1-13_F             | AGGTCGATTTGATTGAGGAA      | NKX3.1-13_R | CCCAACATCAACATCATACTT      |
| NKX3.1-14_F             | CTGCTGCAGGTCTGGGTTT       | NKX3.1-14_R | CAGTGTAGTTTGTGCACCCA       |
| NKX3.1-15_F             | GAGTGAACCCCTGTACCAAACA    | NKX3.1-15_R | CAGTAAAAAAGAGGAATAACTGGTG  |
| NKX3.1-16_F             | CCAAACATAATTTGGGAAGTGAACC | NKX3.1-16_R | CACACTCCAAAATCCACACTAATAA  |
| NKX3.1-17_F             | ATTGCATTGGAGGTTAGGTT      | NKX3.1-17_R | TTCTCCATCGTCTCTGCTATC      |
| NKX3.1-18_F             | CAGGAAACTGACTGTAAGTACAAGA | NKX3.1-18_R | GCCCCTAAGAACATCGTTTC       |
| NKX3.1-19_F             | TGCAATTGGTCAAAGTGAGA      | NKX3.1-19_R | CATCACAGGTGCCCAAAA         |
| NKX3.1-20_F             | AGTCTCTACTGCACTTTAGACCTCT | NKX3.1-20_R | CCCCGTTGAGTTAGATATTATTTTC  |
| NKX3.1-21_F             | GTCAAAGAGAAAAGAGAGACAGTC  | NKX3.1-21_R | CTTTTAAAGGAATAGGGTACACTG   |
| NKX3.1-22_F             | CAGTTTCTCACCTTTAAATCTTAG  | NKX3.1-22_R | AGTCTGATGATGGCATTACAAT     |
| NKX3.1-23_F             | GCTATTCTATAAAAAGGACACTTGG | NKX3.1-23_R | GGGCCATTTAAATATACAGTG      |

## References for Supplementary Figures and Tables

1. Liu, W. et al. Characterization of two functional NKX3.1 binding sites upstream of the PCAN1 gene that are involved in the positive regulation of PCAN1 gene transcription. *BMC Mol Biol* 9, 45 (2008).
2. Wang, Q. et al. A hierarchical network of transcription factors governs androgen receptor-dependent prostate cancer growth. *Mol Cell* 27, 380-92 (2007).
